# Supplementary material
Source: publisher figshare collection journal article supplement (https://frontiersin.figshare.com/ndownloader/files/14700188)
Supplement: Supplementary file [file 14700188]

## *Supplementary Material*

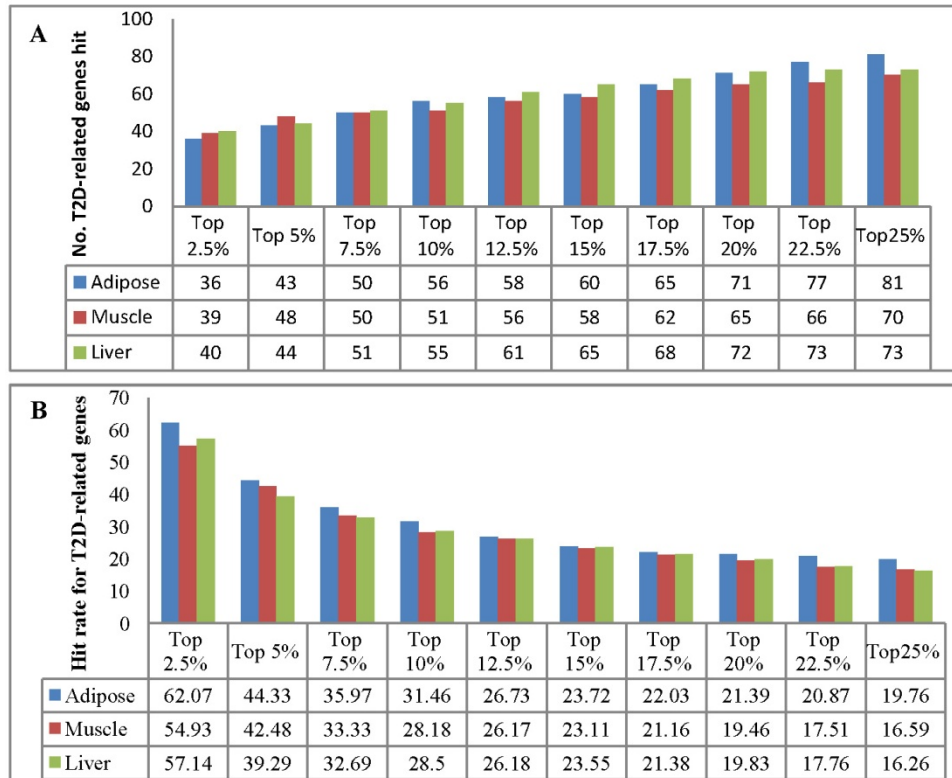

**Figure S 1.** The numbers **(A)** and the coverage rates **(B)** of the disease related genes collected from T2D-pathway and RGD database hit by each MCC.
